# Supplementary material for: Comparative evaluation of MLFN and RBFN in integrated seismic inversion: physics-guided pseudo-well augmentation for 3D acoustic impedance modeling in an offshore clastic field, southwest Iran
Source: Research Square preprint supplement (doi:10.21203/rs.3.rs-8003709/v1), 2025-11-25
Supplement: Supplementary file 2 [file 13e5e311d1c433b0e0674fd0.docx]

**List of Symbols**

- ***C*** Coordination number (dimensionless)
- **CC** Correlation coefficient (dimensionless)
- ***f*c** Volumetric fraction of clay (dimensionless)
- ***f*q** Volumetric fraction of quartz (dimensionless)
- ***G*dry** Dry shear modulus (GPa)
- ***G*HM** Shear modulus (Hertz–Mindlin) (GPa)
- ***G*sat** Saturated shear modulus (GPa)
- ***G*R** Gamma ray (API)
- ***K*brine**  Bulk modulus of brine (GPa)
- ***K*c**  Bulk modulus of wet clay (GPa)
- ***K*dry** Dry bulk modulus of rock frame (GPa)
- ***K*fluid** Effective fluid bulk modulus (GPa)
- ***K*HM**  Dry bulk modulus (Hertz–Mindlin) (GPa)
- ***K*mineral** Effective bulk modulus of mineral composite (GPa)
- ***K*oil** Bulk modulus of oil (GPa)
- ***K*q** Bulk modulus of quartz (GPa)
- ***K*Reuss** Reuss bound for bulk modulus (GPa)
- ***K*sat** Saturated bulk modulus (GPa)
- ***K*Voigt** Voigt bound for bulk modulus (GPa)
- **MSE** Mean squared error (dimensionless)
- ***MSI*** Matrix stiffness index (dimensionless)
- **NRMSE** Normalized root mean square error (dimensionless)
- ***P*eff** Effective pressure (MPa)
- ***Phi*c** Critical porosity (v/v or fraction)
- ***Phi*e** Effective porosity (v/v or fraction)
- ***Phi*T** Total porosity (v/v or fraction)
- **PQ** Prediction quality (dimensionless)
- ***Rho*** Bulk density (g/cm³)
- ***Rho*brine** Brine density (g/cm³)
- ***Rho*c** Wet clay density (g/cm³)
- ***Rho*mineral** Mineral matrix density (g/cm³)
- ***Rho*oil** Oil density (g/cm³)
- ***Rho*q** Quartz density (g/cm³)
- ***Rho*sat** Saturated rock density (g/cm³)
- **RMSE** Root mean square error (dimensionless)
- ***Sw*** Water saturation (v/v or fraction)
- ***Vp*** Compressional wave velocity (m/s)
- ***Vs*** Shear wave velocity (m/s)
- ***V*shale** Shale volume (v/v or fraction)

**Neural network / Model symbols**

- **MLFN**  multi-layer feedforward network
- **RBFN** Radial basis function network
- **ML** Machine learning
- **RPM**
- **VRH** Voigt–Reuss–Hill averaging scheme
- **LOWO-CV** Leave-one-well-out cross-validation

**Greek letters**

- ***μ*mineral** Shear modulus of mineral composite (GPa)
- ***ν***  Poisson’s ratio of mineral frame (dimensionless)

**Abbreviations**

- **CG** Conjugate gradient
- **TWT** Two-way traveltime
