# Supplementary material for: Comparative evaluation of MLFN and RBFN in integrated seismic inversion: physics-guided pseudo-well augmentation for 3D acoustic impedance modeling in an offshore clastic field, southwest Iran
Source: Research Square preprint supplement (doi:10.21203/rs.3.rs-8003709/v1), 2025-11-25
Supplement: Supplementary file 3 [file b66a2255f19bca9cc34794cc.docx]

**Highlights**

 Physics-guided pseudo-well generation reduces the impact of sparse well control.

 Soft-sand rock physics and Gassmann substitution yield realistic elastic trends.

 Six seismic attributes are mapped directly to acoustic impedance via ML inversion.

 MLFN outperforms RBFN, achieving higher accuracy and spatial continuity.

 Workflow produces reliable 3D impedance models in offshore clastic reservoirs.
