# Supplementary figures and images for: Comparative evaluation of MLFN and RBFN in integrated seismic inversion: physics-guided pseudo-well augmentation for 3D acoustic impedance modeling in an offshore clastic field, southwest Iran
Source: Research Square preprint supplement (doi:10.21203/rs.3.rs-8003709/v1), 2025-11-25

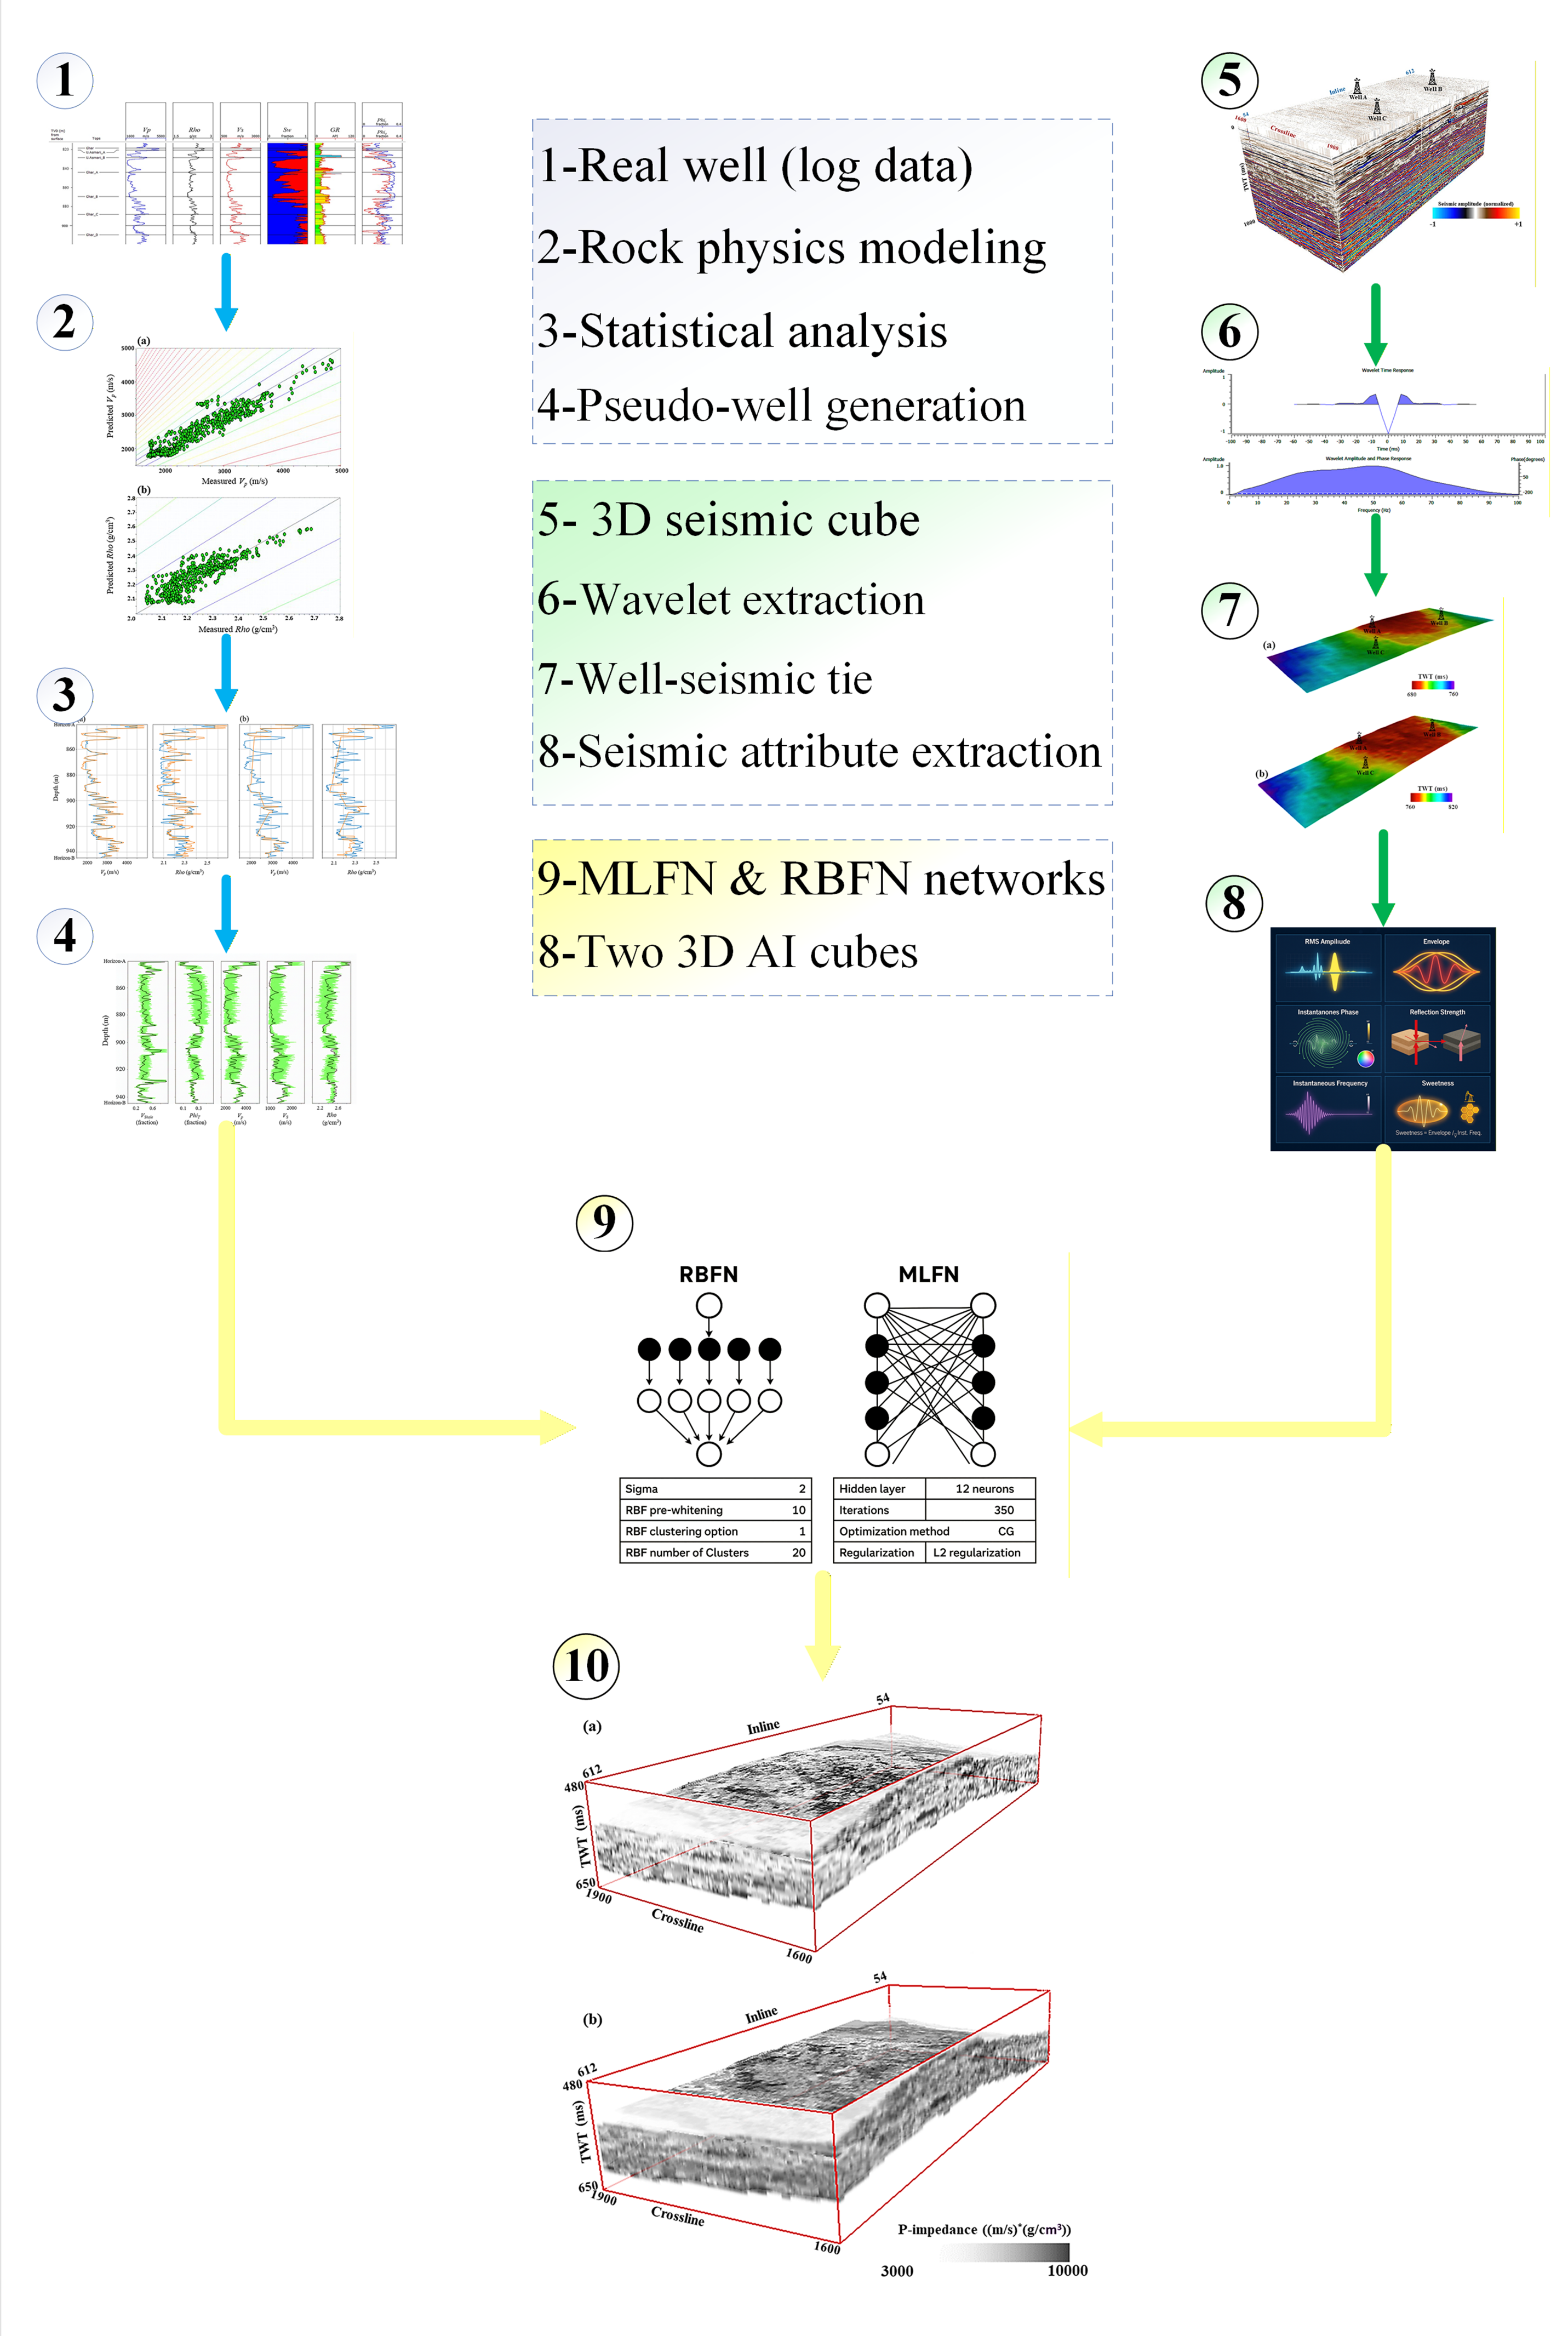

Supplement: Supplementary file 1 [file 04e32c86b9a856bc0ebf35bb.docx]
